# Supplementary material for: Effect of Bariatric Surgery on Risk of Complications After Total Knee Arthroplasty: A Randomized Clinical Trial
Source: PubMed Central journal article supplement (PMC9011119; doi:10.1001/jamanetworkopen.2022.6722), 2022-04-14
Supplement: jamanetwopen-e226722-s002.pdf [file jamanetwopen-e226722-s002.pdf]

## Supplemental Online Content

Dowsey MM, Brown WA, Cochrane A, Burton PR, Liew D, Choong PF. Effect of bariatric surgery on risk of complications after total knee arthroplasty: a randomized clinical trial. *JAMA Netw Open*. 2022;5(4):e226722. doi:10.1001/jamanetworkopen.2022.6722

**eTable.** Reason for Study Exclusion

**eFigure.** Study Timelines

This supplemental material has been provided by the authors to give readers additional information about their work.

**eTable. Reason for Study Exclusion**

| <b>Excluded</b>                                                                                                                                                                                                                                                                                                                                                                                         | <b>Number (n=277)</b>                                                                                                                                              |
|---------------------------------------------------------------------------------------------------------------------------------------------------------------------------------------------------------------------------------------------------------------------------------------------------------------------------------------------------------------------------------------------------------|--------------------------------------------------------------------------------------------------------------------------------------------------------------------|
| <b>Not meeting inclusion criteria</b>                                                                                                                                                                                                                                                                                                                                                                   | <b>152</b>                                                                                                                                                         |
| <ul style="list-style-type: none"><li>• Non-English speaking</li><li>• Previous/current cancer diagnosis</li><li>• Mental health impairment</li><li>• Previous abdominal surgery</li><li>• Previous bariatric surgery</li><li>• Medical condition</li><li>• Rural (limited access to services)</li><li>• Other</li></ul>                                                                                | <ul style="list-style-type: none"><li>• 15</li><li>• 14</li><li>• 19</li><li>• 13</li><li>• 30</li><li>• 32</li><li>• 8</li><li>• 21</li></ul>                     |
| <b>Declined participation</b>                                                                                                                                                                                                                                                                                                                                                                           | <b>125</b>                                                                                                                                                         |
| <ul style="list-style-type: none"><li>• Negative impression of LAGB</li><li>• Preference for medical management</li><li>• Travel burdensome</li><li>• Did not want to delay TKA</li><li>• Scheduled date for TKA</li><li>• Belief that weight loss was unnecessary</li><li>• Family declined participation</li><li>• GP declined participation</li><li>• Too stressful</li><li>• Virtual LAGB</li></ul> | <ul style="list-style-type: none"><li>• 8</li><li>• 32</li><li>• 23</li><li>• 24</li><li>• 3</li><li>• 3</li><li>• 3</li><li>• 3</li><li>• 7</li><li>• 2</li></ul> |

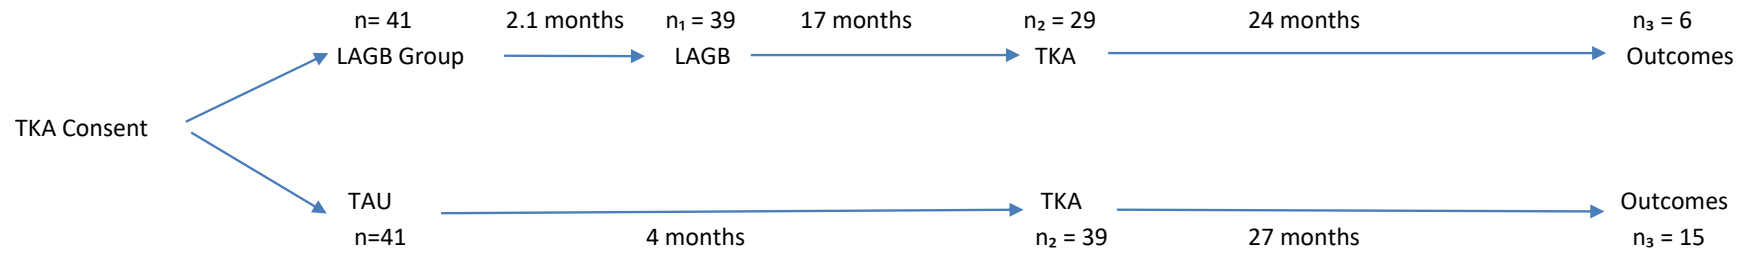

**eFigure. Study Timelines**
