# Supplementary material for: Effect of Bariatric Surgery on Risk of Complications After Total Knee Arthroplasty: A Randomized Clinical Trial
Source: PubMed Central journal article supplement (PMC9011119; doi:10.1001/jamanetworkopen.2022.6722), 2022-04-14
Supplement: jamanetwopen-e226722-s003.pdf [file jamanetwopen-e226722-s003.pdf]

## Data Sharing Statement

Dowsey. Effect of Bariatric Surgery on Risk of Complications After Total Knee Arthroplasty. *JAMA Netw Open*. Published April 14, 2022. doi:10.1001/jamanetworkopen.2022.6722

### Data

**Data available:** No

### Additional Information

**Explanation for why data not available:** Consent for data sharing was not obtained and ethics approval would be required from the study institutions for future use of trial data.
